# Supplementary material for: The microRNA-212/132 cluster regulates B cell development by targeting Sox4
Source: PubMed Central journal article supplement — J Exp Med. 2015 Sep 21;212(10):1679–92. doi: 10.1084/jem.20150489 (PMC4577845; doi:10.1084/jem.20150489), 2015-09-21
Supplement: supp_jem.20150489_JEM_20150489_sm.pdf [file supp_jem.20150489_JEM_20150489_sm.pdf]

## SUPPLEMENTAL MATERIAL

Mehta et al., <http://www.jem.org/cgi/content/full/jem.20150489/DC1>**Table S1.** Summary of differential gene expression analysis between immature splenic B cells obtained from WT and miR-212/132<sup>-/-</sup> mice

| Parameters      | WT no stim | WT anti-IgM 8h | WT anti-IgM 20h | KO no stim | KO anti-IgM 8h | KO anti-IgM 20h |
|-----------------|------------|----------------|-----------------|------------|----------------|-----------------|
| WT no stim      | 0          | 326            | 491             | 63         | 330            | 472             |
| WT anti-IgM 8h  | 717        | 0              | 121             | 823        | 70             | 117             |
| WT anti-IgM 20h | 1036       | 227            | 0               | 1136       | 300            | 59              |
| KO no stim      | 54         | 448            | 695             | 0          | 378            | 653             |
| KO anti-IgM 8h  | 666        | 83             | 163             | 707        | 0              | 123             |
| KO anti-IgM 20h | 1060       | 279            | 88              | 1124       | 293            | 0               |

Table shows the number of up-regulated genes in the described row sample compared to the described column sample.

**Table S2.** Sequences for SOX4 shRNA constructs

| SOX4 shRNA sequence (in miR-155-arms-and-loop-format) |                                                                                            |
|-------------------------------------------------------|--------------------------------------------------------------------------------------------|
| mmu-FOXO3 shRNA #1                                    | gaaggctgtaTGCTGTTGAGCAGCTCCAGCGTTTGGTTTTGGCCACTGACTGACCAAACGCTAAGCTGCTCAAcaggacacaaggcctg  |
| mmu-FOXO3 shRNA #2                                    | gaaggctgtaTGCTGTTCACTTTCTTGTGCGCAGGGGTTTTGGCCACTGACTGACCCCTGCCGAAGAAAGTGAAcaggacacaaggcctg |
| mmu-FOXO3 shRNA #3                                    | gaaggctgtaTGCTGTTAGAAAGCTTTGCTTGGCTTGTGGCCACTGACTGACAAGCCAAGAAGCTTCTAAAcaggacacaaggcctg    |

**Table S3.** Primer sequences used for qPCR

| Gene    | Primer sequences        |
|---------|-------------------------|
| SOX4 F  | GACAGCGACAAGATCCGTTCC   |
| SOX4 R  | GTTGCCCGACTTCACCTTC     |
| EBF1 F  | GCATCCAACGGAGTGGAAG     |
| EBF1 R  | GATTCGCGAGGTTAGAAGGC    |
| E2A F   | GGGTGCCAGCGAGATCAAG     |
| E2A R   | ATGAGCAGTTTGGTCTGCGG    |
| PAX5 F  | CCATCAGGACAGGACATGGAG   |
| PAX5 R  | GGCAAGTCCACTATCCTTTGG   |
| PU.1 F  | ATGTTACAGGCGTGCAAAATGG  |
| PU.1 R  | TGATCGCTATGGCTTTCTCCA   |
| IL-7R F | GCGGACGATCACTCCTTCTG    |
| IL-7R R | AGCCCCACATATTTGAAATTCCA |
| Rag1 F  | ACCCGATGAAATCAACACCC    |
| Rag1 R  | CTGGAAGTACTGGAGACTGTCT  |
| Ikzf1 F | ATGTCCCAAGTTTCAGGAAAGG  |
